# Supplementary material for: The nature of the selective species in Fe-HZSM-5 for non-oxidative methane dehydroaromatization
Source: Royal Society of Chemistry journal article supplement (doi:10.1039/c5cy02258d), 2016-01-01
Supplement: c5cy02258d1.pdf [file c5cy02258d1.pdf]

## Supporting information

### The Nature of the Selective Species in Fe-HZSM-5 for Non-Oxidative Methane Dehydroaromatization

Yungchieh Lai<sup>1,2</sup> and Götz Vesper<sup>1,2,\*</sup>

<sup>1</sup>U.S. DOE – National Energy Technology Laboratory, Pittsburgh, PA;

<sup>2</sup>Department of Chemical Engineering, Swanson School of Engineering, University of Pittsburgh, PA

\*gveser@pitt.edu

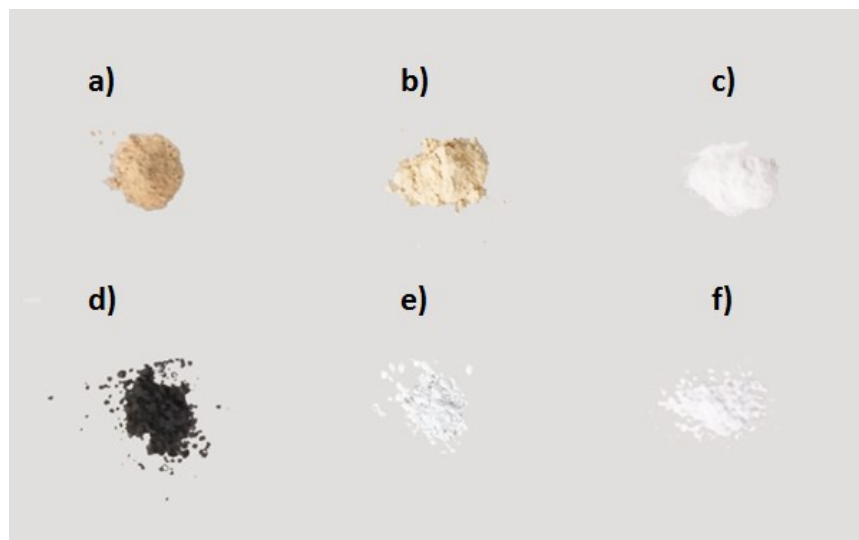

**Figure S1.** Powder samples of the three catalysts as synthesized: a) Fe@HZSM-5, b) Fe/HZSM-5, and c) H-(Fe)ZSM-5; and the same catalysts after H<sub>2</sub>-TPR up to 1000°C: d) Fe@HZSM-5, e) Fe/HZSM-5, and f) H-(Fe)ZSM-5.

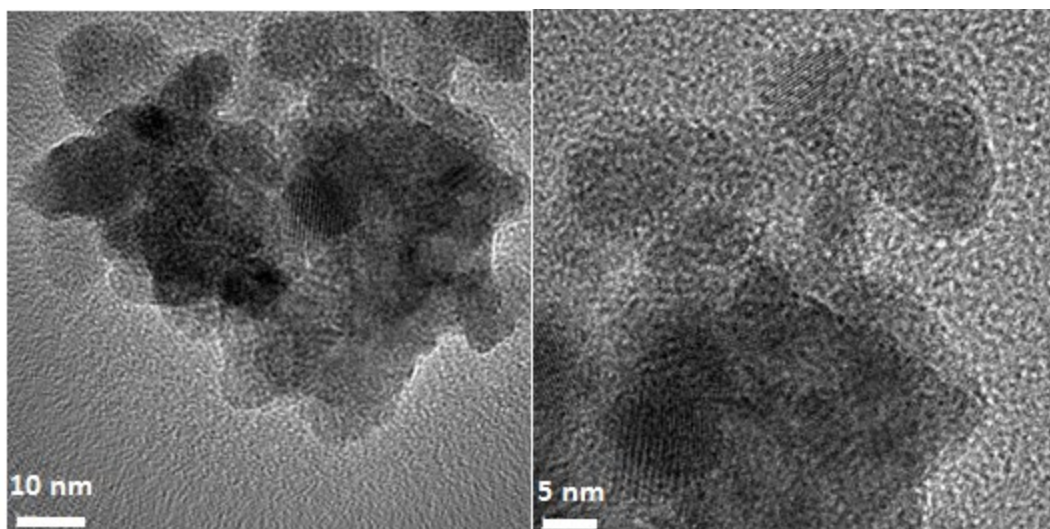

**Figure S2.** TEM for commercial  $\text{Fe}_2\text{O}_3$  NPs.

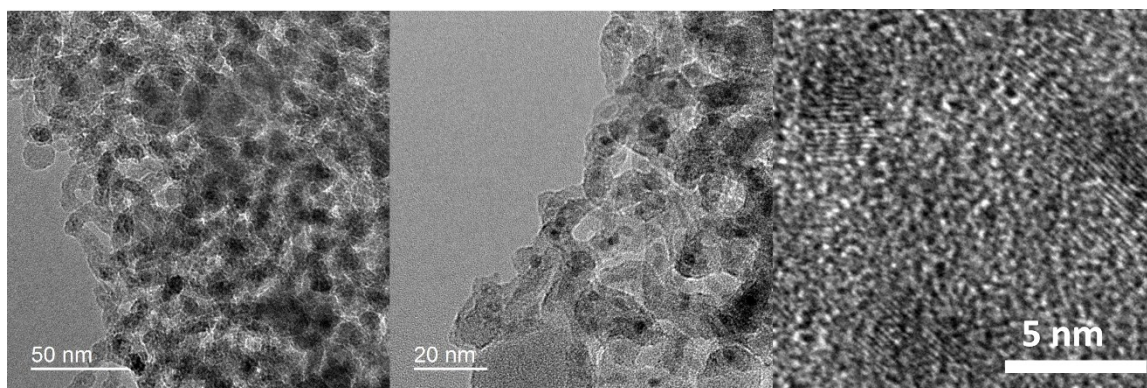

**Figure S3.** TEM images with different magnifications for the precursor of  $\text{Fe@HZSM5}$  catalyst “ $\text{Fe@silica}$ ”. While the structure of the silica matrix is fundamentally different from that of the HZSM-5 zeolite, the embedded Fe NPs are identical to those after conversion.

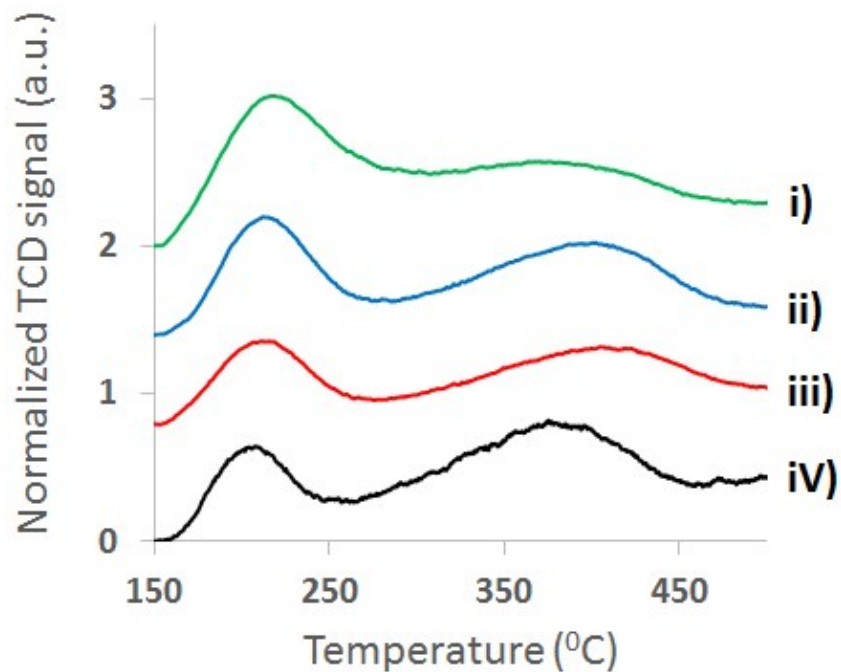

**Figure S4.**  $\text{NH}_3$ -TPD profiles for i) Fe@HZSM-5, ii) H-(Fe)ZSM-5 iii) Fe/HZSM-5, and iv) parent HZSM-5.

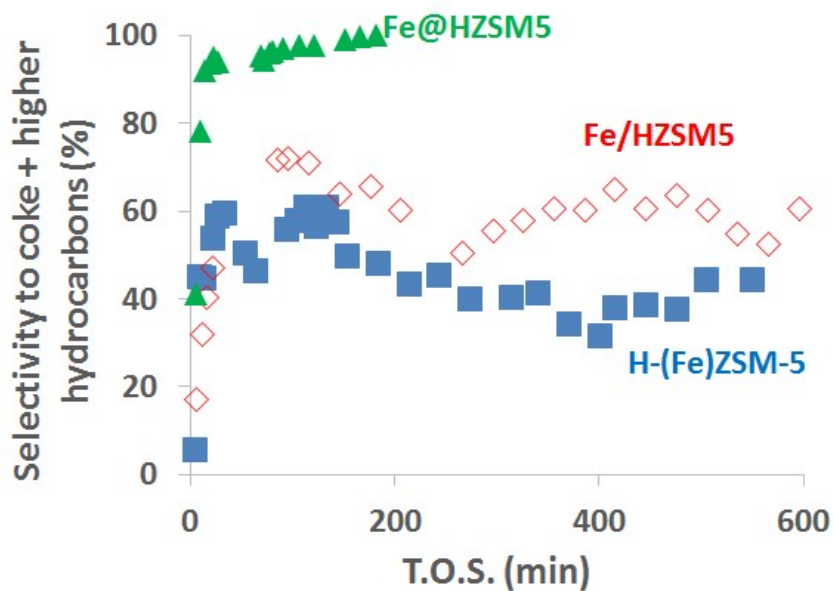

**Figure S5.** Selectivity towards higher hydrocarbons and coke for the three Fe-HZSM-5 catalysts at 700°C. GHSV: 3750 cc/g/h, calculated from a carbon balance at each time point. Note that while the experimental set-up did not allow detection of higher hydrocarbons, quantification of the carbon formation at the end of each experimental run (see table 3 in the main paper) suggests that the majority of the combined selectivity shown in the graph is coke selectivity.

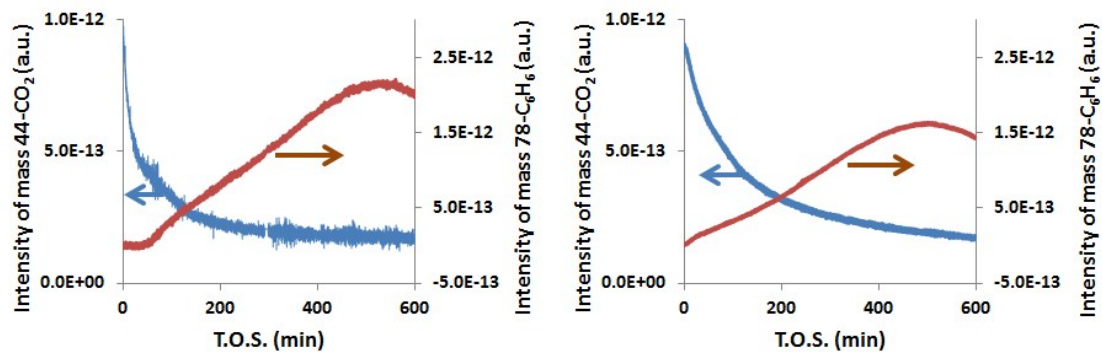

**Figure S6.** Mass spectroscopy data for the Fe/HZSM5 catalyst (left) and H-(Fe)ZSM-5 catalyst (right) at 700°C (GHSV: 3750 cc/g/h with 50% CH<sub>4</sub> and 50% He). Since oxygen can only be extracted from the Fe species in the reaction system, CO<sub>2</sub> observed over these two catalysts must result from reduction of Fe species.
